# Supplementary material
Source: publisher figshare collection journal article supplement (https://acs.figshare.com/ndownloader/files/9218107)
Supplement: Supplementary file 1 [file 9218107]

## Supporting Information

# The Effect of Stoichiometry on the Stability of Inorganic Cesium Lead Mixed-Halide Perovskites Solar Cells

*Qingshan Ma<sup>†</sup>, Shujuan Huang<sup>\*†</sup>, Sheng Chen<sup>†</sup>, Meng Zhang<sup>†</sup>, Cho Fai Jonathan Lau<sup>†</sup>, Mark N. Lockrey<sup>‡</sup>, Hemant K. Mulmudi<sup>§</sup>, Yuchao Shan<sup>⊥</sup>, Jizhong Yao<sup>⊥</sup>, Jianghui Zheng<sup>†</sup>, Xiaofan Deng<sup>†</sup>, Kylie Catchpole<sup>§</sup>, Martin A. Green<sup>†</sup>, Anita W. Y. Ho-Baillie<sup>†</sup>*

<sup>†</sup> Australian Centre for Advanced Photovoltaics, University of New South Wales, Sydney 2052, Australia

<sup>‡</sup> Australian National Fabrication Facility ACT Node, Research School of Physics and Engineering, The Australian National University, Canberra, ACT 2601, Australia

<sup>§</sup> Centre for Sustainable Energy Systems, Research School of Engineering, Australian National University, Canberra, ACT 2601, Australia

<sup>⊥</sup> Microquanta Semiconductor Co., LTD, Hangzhou, 311121, China

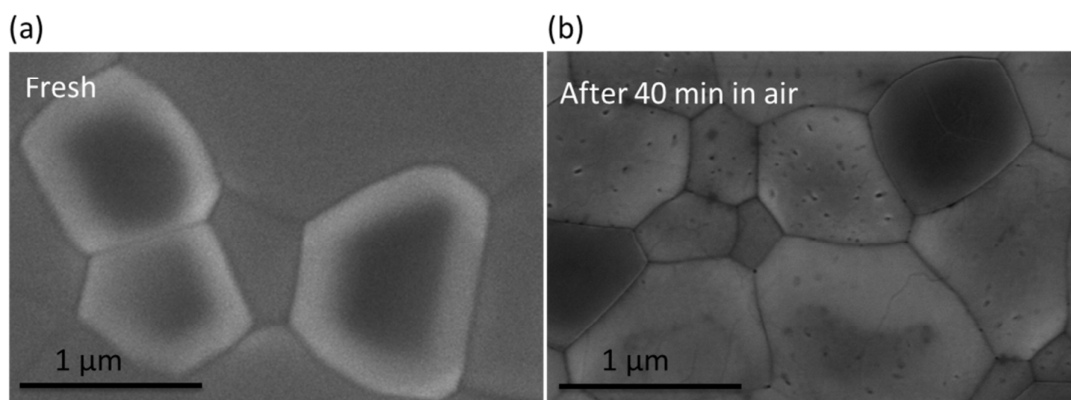

**Figure S1.** Top view SEM images of (a) fresh and (b) air-exposed  $\text{PbI}_2$ -rich  $\text{CsPbI}_2\text{Br}$  films.

Damages (pinholes) can be seen on the grains after air exposure.

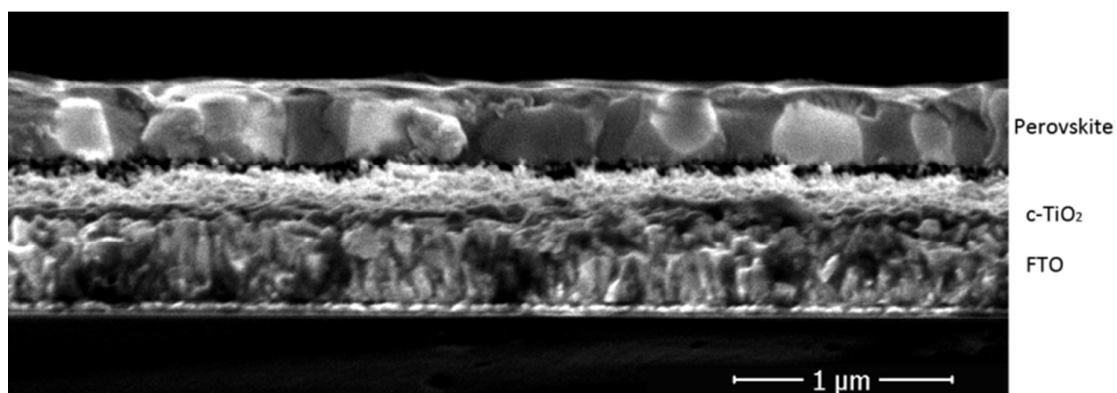

**Figure S2.** Cross sectional SEM image of CsBr rich  $\text{CsPbI}_2\text{Br}$  on compact  $\text{TiO}_2$  and FTO. It can be seen that the brighter impurity grains in the perovskite film are not on the surface, but throughout the film.

(a) CsBr rich

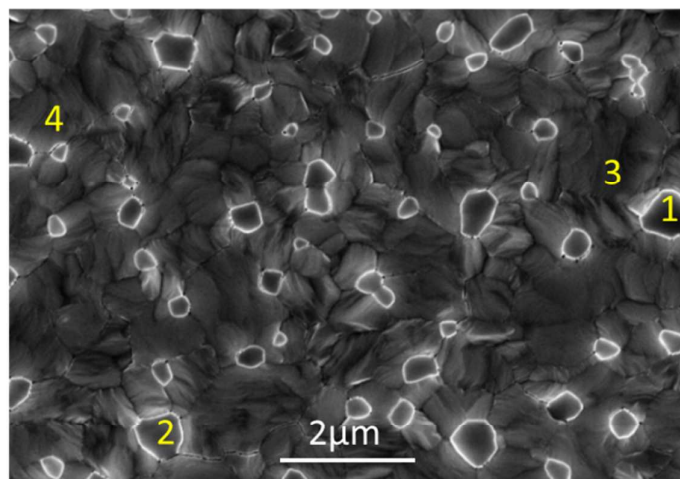

| grains | Cs   | Pb | I    | Br   |
|--------|------|----|------|------|
| 1      | 2.65 | 1  | 2.35 | 1.76 |
| 2      | 2.50 | 1  | 2.27 | 1.74 |
| 3      | 1.10 | 1  | 1.73 | 1.01 |
| 4      | 1.12 | 1  | 1.73 | 1.07 |

(b) Stoichiometry balanced

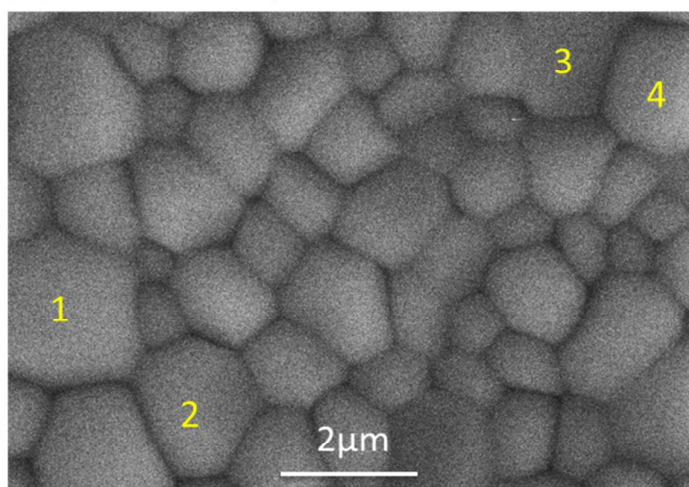

| grains | Cs   | Pb | I    | Br   |
|--------|------|----|------|------|
| 1      | 0.94 | 1  | 2.28 | 1.26 |
| 2      | 0.96 | 1  | 2.27 | 1.29 |
| 3      | 0.96 | 1  | 2.36 | 1.38 |
| 4      | 1.02 | 1  | 2.27 | 1.31 |

(c)  $\text{PbI}_2$  rich

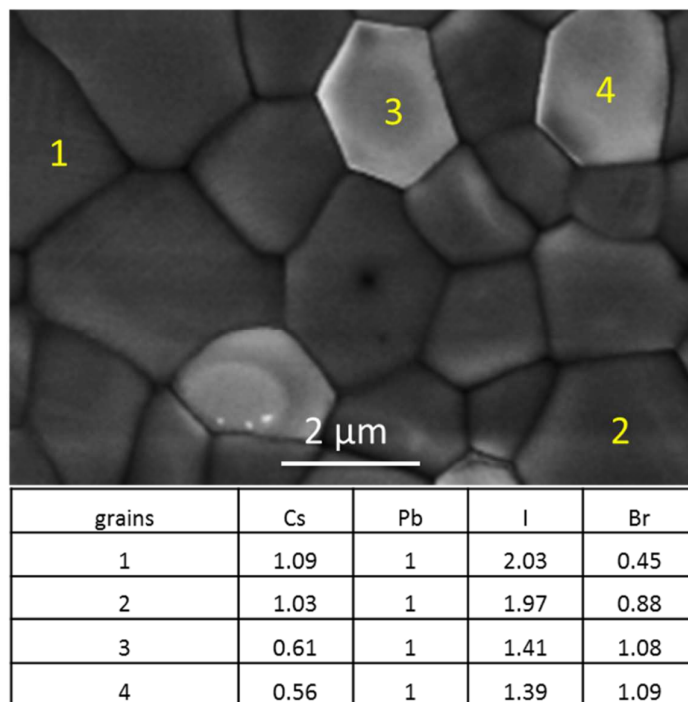

**Figure S3.** EDS point analysis on the (a) CsBr-rich, (b) stoichiometrically balanced and (c)  $\text{PbI}_2$ -rich  $\text{CsPbI}_2\text{Br}$  films (atomic ratio normalized to Pb element).

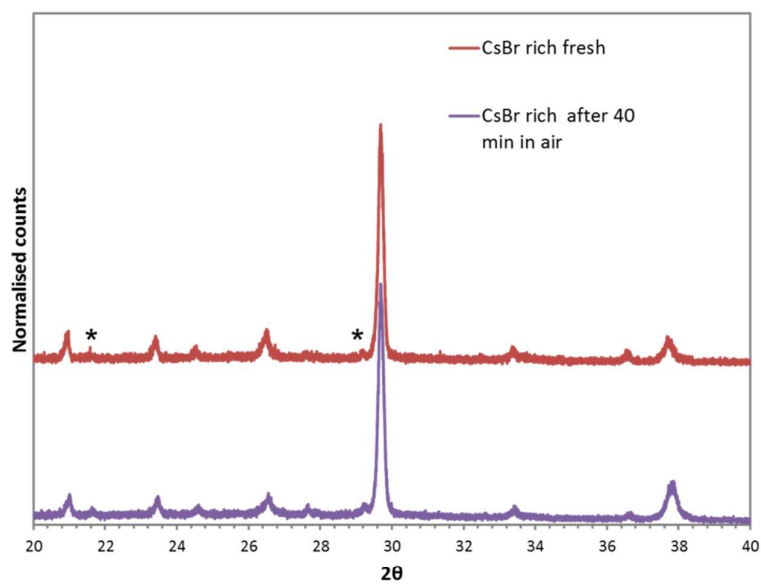

**Figure S4.** XRD pattern of the fresh and air-exposed CsBr-rich CsPbI<sub>2</sub>Br films showing that the (110) peak at 20.95° has a small split peak at 21.58° and the (200) peak at 29.65° has a shoulder peak at 29.22°, as indicated by “\*”.

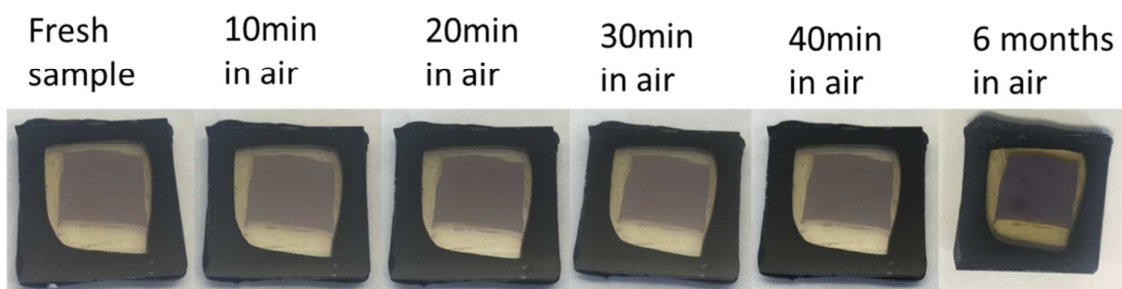

**Figure S5.** Photos showing the lack of degradation for encapsulated stoichiometrically balanced CsPbI<sub>2</sub>Br films upon exposure to air. It can be seen that with encapsulation the colour of the perovskite film remains the same even after 6 months.
